# Supplementary material
Source: publisher figshare collection journal article supplement (https://acs.figshare.com/ndownloader/files/4400521)

**Photocurrent Generation from Porphyrin/Fullerene Complexes Assembled in a Tethered Lipid Bilayer**

Wei Zhan,<sup>\*,1</sup> Kai Jiang,<sup>1</sup> Matthew D. Smith,<sup>2</sup> Michael D. Best,<sup>\*,2</sup> Maria L. Auad,<sup>3</sup> Joshua V. Ruppel,<sup>4</sup> Chungsik Kim,<sup>4</sup> and X. Peter Zhang<sup>4</sup>

<sup>1</sup>Department of Chemistry and Biochemistry

<sup>3</sup>Department of Polymer and Fiber Engineering

Auburn University

Auburn, AL 36849

<sup>2</sup>Department of Chemistry

The University of Tennessee

Knoxville, TN 37996

<sup>4</sup>Department of Chemistry

The University of South Florida

Tampa, FL 33620

## S1. NMR spectrum of methyl porphyrin ester **1**

SpinWorks 2.5: 5-(4-Methoxycarbonylphenyl)-10,15,20-tris(3,5-di-*t*-butylphenyl)porphyrin

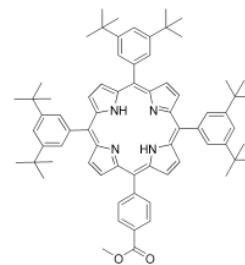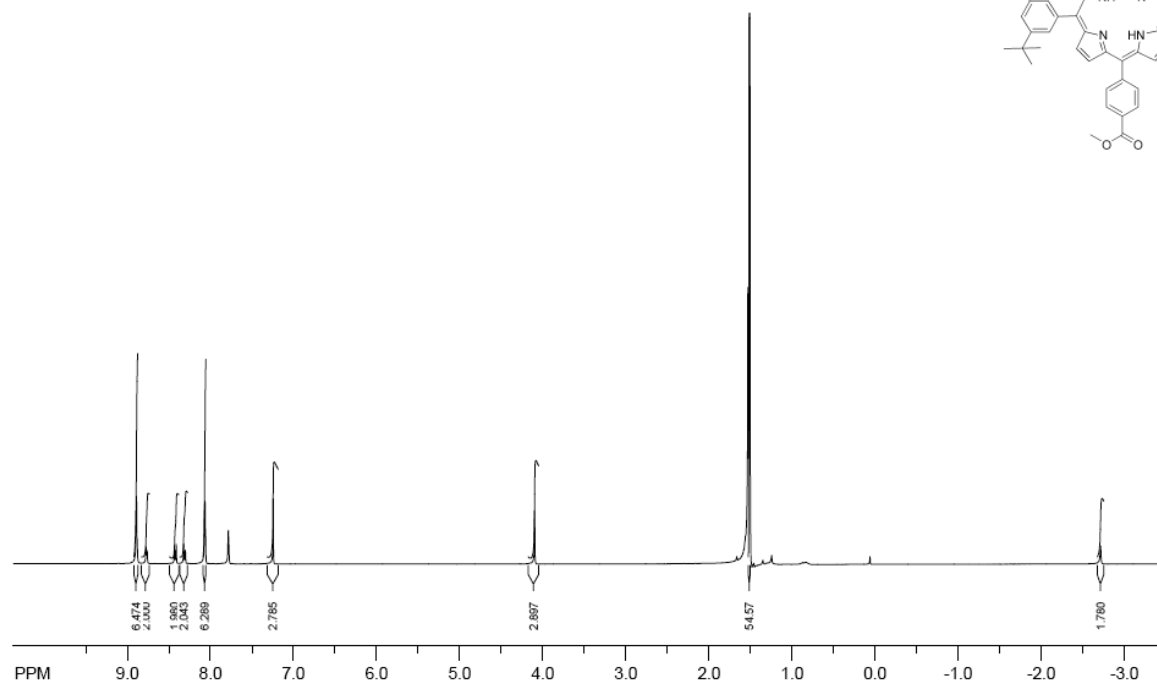

## S2. Synthesis scheme and NMR spectrum of ZnP-DOPE (2)

Full synthesis details are included in the Experimental Section.

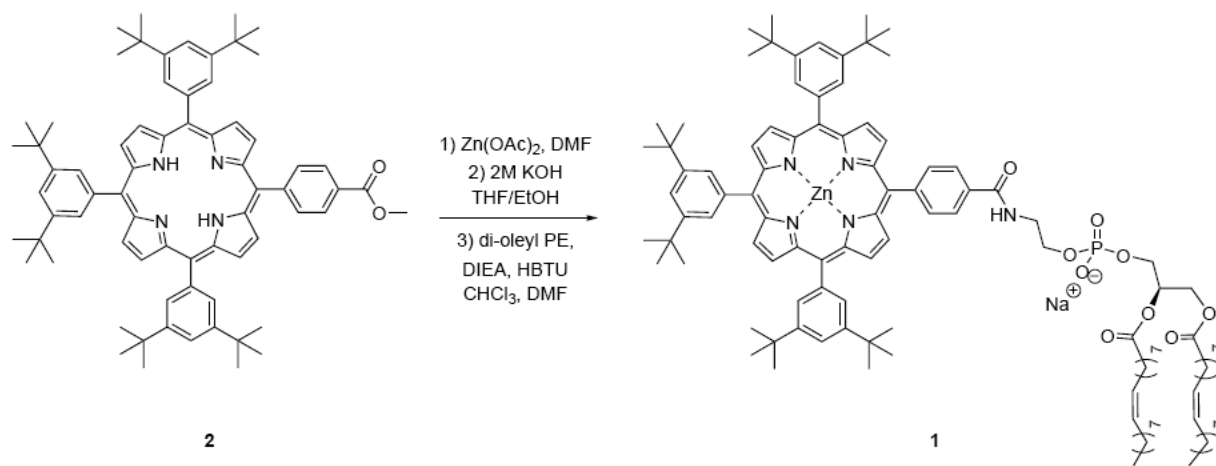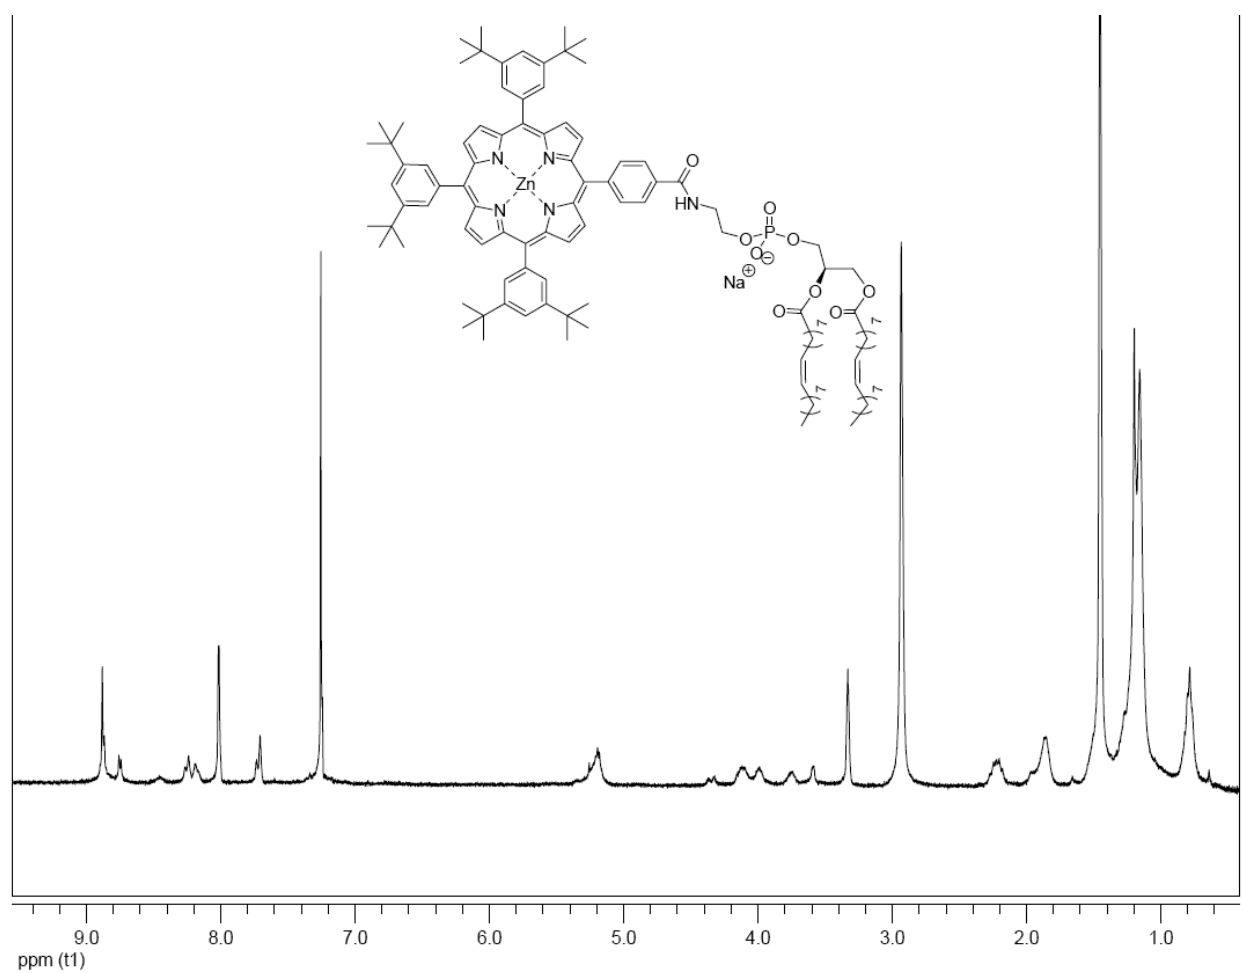

### S3. Fluorescence excitation spectra of ZnP in liposomes and organic solvents

Experimental conditions are described in Experimental Section. Emission wavelength: 640 nm (ZnP in liposome and chloroform) and 655 nm for the methanol sample. In all spectra, the last peak is an artifact due to the set emission wavelengths.

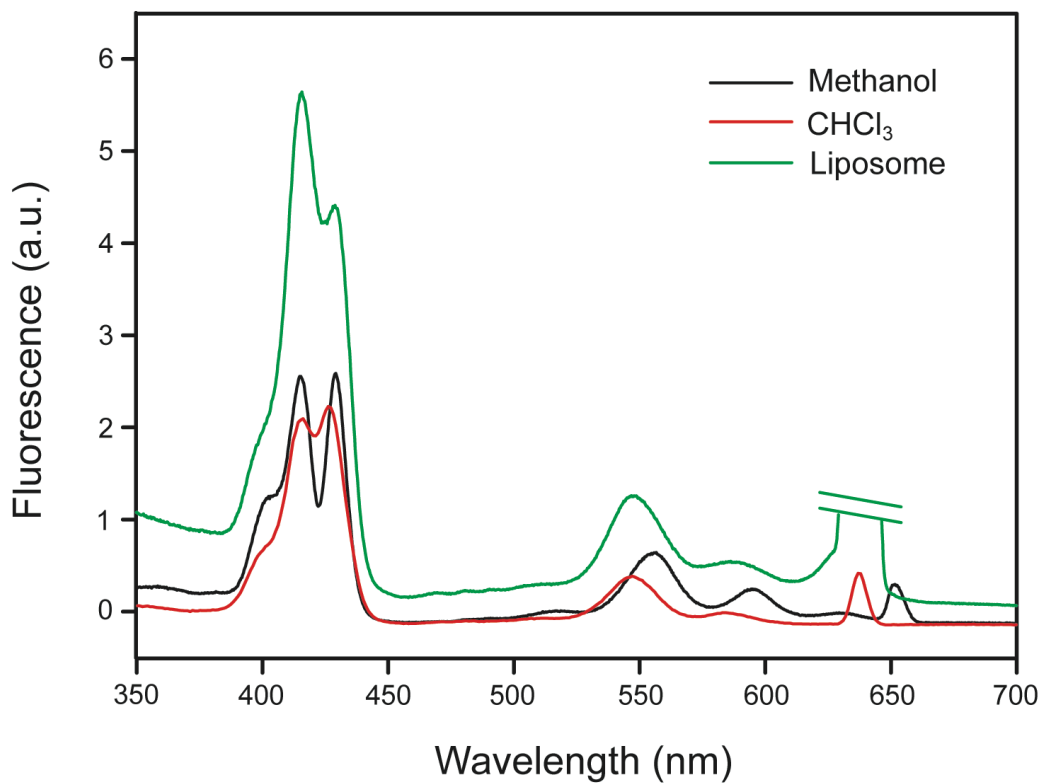

#### S4. UV-vis absorption and fluorescence emission spectra of liposomes containing 1-3% ZnP

Experimental conditions are identical to those described in Figure 3&4.

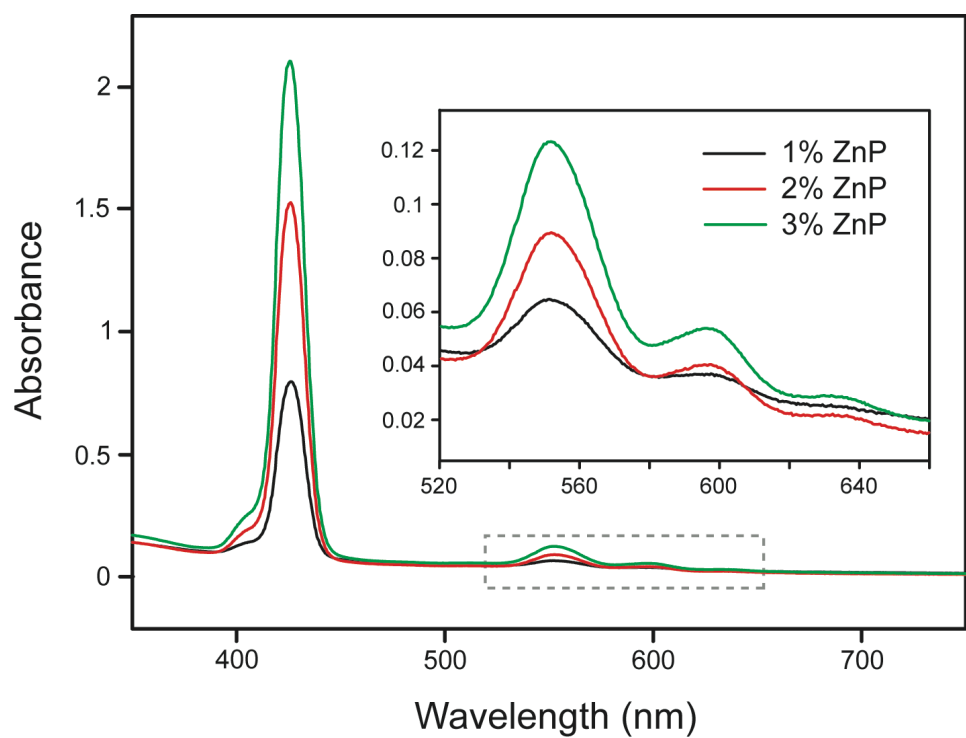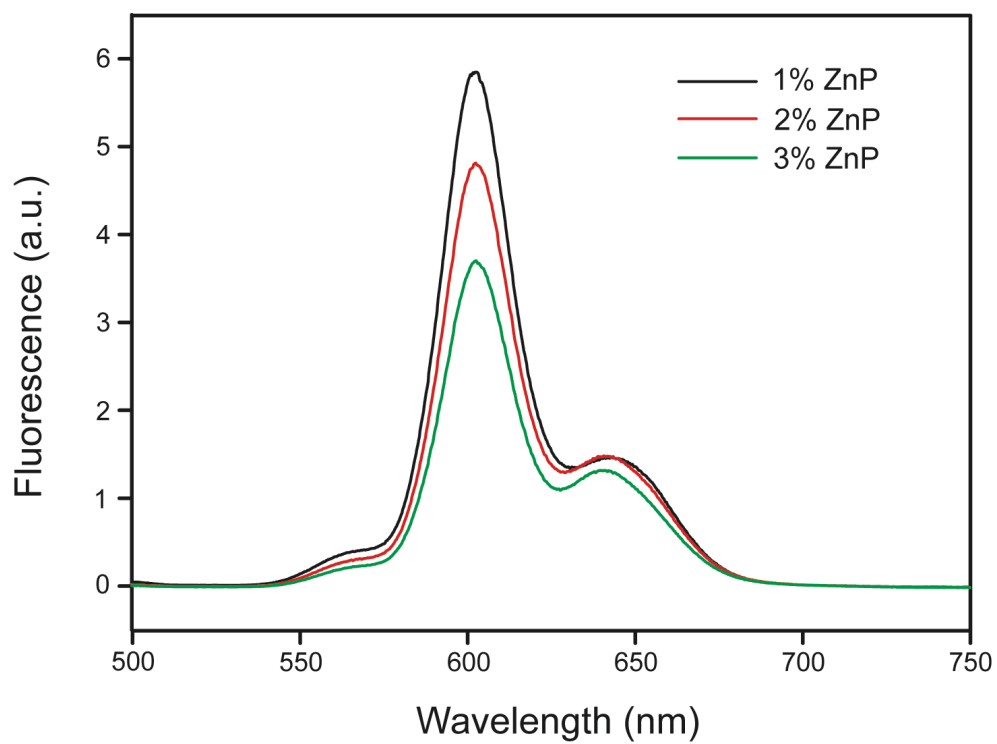

Supplement: Supplementary file 1 [file 4400521]
